# Supplementary material for: Isobutanol production freed from biological limits using synthetic biochemistry
Source: PubMed Central journal article supplement (PMC7453195; doi:10.1038/s41467-020-18124-1), 2020-08-27
Supplement: 41467_2020_18124_MOESM1_ESM.pdf [file 41467_2020_18124_MOESM1_ESM.pdf]

**Isobutanol production freed from biological limits using synthetic  
biochemistry**

Sherkhanov *et al.*

**Supplementary Table 1. Summary of production parameters obtained using cell-based methods.**

| Organism                               | Substrate                    | Titer (g/L) | Yield (%) | Productivity (g/L/h) | Comments                                                                | Ref. |
|----------------------------------------|------------------------------|-------------|-----------|----------------------|-------------------------------------------------------------------------|------|
| <i>Magnusiomyces magnusii</i>          | Glucose and 2-oxoisovalerate | 0.76        | nd        | 0.01*                |                                                                         | 1    |
| <i>Saccharomyces cerevisiae</i>        | Glucose                      | 0.26        | nd        | 0.003                |                                                                         | 2    |
| <i>Saccharomyces cerevisiae</i>        | Xylose                       | 3.1         | 9.4       | 0.04                 | fed-batch fermentation                                                  | 3    |
| <i>Saccharomyces cerevisiae</i>        | Glucose                      | 8.4         | 13        | 0.04*                | Fed-batch fermentation                                                  | 4    |
| <i>Saccharomyces cerevisiae</i>        | Glucose                      | 0.15        | nd        | nd                   |                                                                         | 5    |
| <i>Saccharomyces cerevisiae</i>        | Glucose                      | 0.64        | 1.6*      | nd                   |                                                                         | 6    |
| <i>Saccharomyces cerevisiae</i>        | Glucose                      | 1.62        | 3.9*      | 0.25*                |                                                                         | 7    |
| <i>Saccharomyces cerevisiae</i>        | Glucose                      | 0.68        | 8.3*      | nd                   |                                                                         | 8    |
| <i>Saccharomyces cerevisiae</i>        | xylose                       | 0.09        | nd        | 0.002*               |                                                                         | 9    |
| <i>Clostridium thermocellum</i>        | cellulose                    | 5.1         | nd        | nd                   |                                                                         | 10   |
| <i>Clostridium thermocellum</i>        | cellulose                    | 5.4         | 41        | 0.07*                |                                                                         | 11   |
| <i>Clostridium cellulolyticum</i>      | cellulose                    | 0.66        | nd        | nd                   |                                                                         | 12   |
| <i>Geobacillus thermoglucosidasius</i> | cellobiose                   | 0.6         | 8.3       | 0.01*                |                                                                         | 13   |
| <i>Bacillus subtilis</i>               | Glucose                      | 6.1         | 63        | 0.17*                | fed-batch fermentation                                                  | 14   |
| <i>Bacillus subtilis</i>               | Aminoacids                   | 0.09        | 47        | nd                   |                                                                         | 15   |
| <i>Bacillus megaterium</i>             | 2-ketoisovalerate            | 0.3         | 80        | 0.01*                | cultures grown and product extracted under supercritical carbon dioxide | 16   |
| <i>Synechococcus elongatus</i>         | carbon dioxide               | 0.45        | nd        | 0.003*               |                                                                         | 17   |
| <i>Ralstonia eutropha</i>              | carbon dioxide               | 0.85        | nd        | nd                   | bioreactor                                                              | 18   |
| <i>Escherichia coli</i>                | Glucose                      | 50          | 68        | 0.7                  | bioreactor with <i>in situ</i> product removal (gas stripping)          | 19   |
| <i>Escherichia coli</i>                | Glucose                      | 22          | 86        | 0.31*                |                                                                         | 20   |
| <i>Escherichia coli</i>                | Aminoacids                   | 2           | 56        | 0.02*                |                                                                         | 21   |

nd – not determined

\* - the values were not reported but were estimated from graphs in the publication if available.

**Supplementary Table 2. Summary of genome mining screen.**

|         | Enzyme                                                        | Organism                     | Accession number | Codon optimized? | Expression level | Activity at 25 °C | Isobutanol stability |
|---------|---------------------------------------------------------------|------------------------------|------------------|------------------|------------------|-------------------|----------------------|
| Hex     | Hexokinase                                                    | <i>T. maritima</i>           | AAD36537         | No               | +++              | +++               | +++                  |
| Glk     | Glucokinase                                                   | <i>G. stearothermophilus</i> | KOR95707         | No               | +++              | ++++              |                      |
| Pgi     | Glucose-6-phosphate isomerase                                 | <i>T. maritima</i>           | AAD36455         | No               | +++              | +++               | +++                  |
|         | Glucose-6-phosphate isomerase                                 | <i>P. aerophilum</i>         | HII46470         | No               | +                | +                 |                      |
| Pfk     | Phosphofructokinase B                                         | <i>E. coli</i>               | ACT43547         | No               | +++              | ++++              | ++                   |
|         | Phosphofructokinase A                                         | <i>G. stearothermophilus</i> | KOR92562         | No               | +++              | ++++              | -                    |
|         | Phosphofructokinase                                           | <i>P. aerophilum</i>         | HII48166         | No               | +                | +                 | -                    |
|         | Phosphofructokinase                                           | <i>T. thermophilus</i>       | BAD71785         | No               | ++               | ++                |                      |
| Fba     | Fructose-1,6-bisphosphate aldolase                            | <i>T. maritima</i>           | AAD35362         | No               | +                | +                 | +++                  |
|         | Fructose-1,6-bisphosphate aldolase                            | <i>G. stearothermophilus</i> | KOR93738         | No               | +++              | ++                |                      |
|         | Fructose-1,6-bisphosphate aldolase                            | <i>T. thermophilus</i>       | BAD71596         | No               | ++               | ++                |                      |
| Tpi-Pgk | Triose Phosphate Isomerase - Phosphoglycerate Kinase Fusion   | <i>T. maritima</i>           | AAD35771         | No               | +++              | +++               | +++                  |
| GapN    | Glyceraldehyde-3-phosphate Dehydrogenasnon-phosphorylating)   | <i>T. kodakarensis</i>       | BAD84894         | No               | ++               | ++                | +++                  |
|         | Glyceraldehyde-3-phosphate Dehydrogenasnon-phosphorylating)   | <i>T. tenax</i>              | CCC81810         | No               | ++               | +                 |                      |
|         | Glyceraldehyde-3-phosphate Dehydrogenasnon-phosphorylating)   | <i>S. solfataricus</i>       | AAK43292         | No               | ++               | +                 |                      |
|         | Glyceraldehyde-3-phosphate Dehydrogenasnon-phosphorylating)   | <i>A. permix</i>             | BAA80789         | No               | -                | -                 |                      |
|         | Glyceraldehyde-3-phosphate Dehydrogenasnon-phosphorylating)   | <i>M. jannaschii</i>         | AAB99418         | No               | ++               | -                 |                      |
|         | Glyceraldehyde-3-phosphate Dehydrogenasnon-phosphorylating)   | <i>T. takaii</i>             | BAT70977         | No               | ++               | -                 |                      |
|         | Glyceraldehyde-3-phosphate Dehydrogenasnon-phosphorylating)   | <i>M. sedula</i>             | ABP95456         | No               | ++               | -                 |                      |
|         | Glyceraldehyde-3-phosphate Dehydrogenasnon-phosphorylating)   | <i>P. furiosus</i>           | AAL80879         | No               | -                | -                 |                      |
|         | Glyceraldehyde-3-phosphate Dehydrogenasnon-phosphorylating)   | <i>T. neapolitana</i>        | ACM23724         | No               | -                | -                 |                      |
| GapDH   | Glyceraldehyde-3-phosphate Dehydrogenasphosphorylating)       | <i>A. fulgidus</i>           | AAB89515         | No               | ++               | ++                | +++                  |
|         | Glyceraldehyde-3-phosphate Dehydrogenasphosphorylating)       | <i>G. stearothermophilus</i> | KOR95271         | No               | +++              | +++               |                      |
| Pgk     | Phosphoglycerate Kinase                                       | <i>T. maritima</i>           | AAD35771         | No               | +++              | +++               | +++                  |
|         | Phosphoglycerate Kinase                                       | <i>G. stearothermophilus</i> | KOR95272         | No               | +++              | +++               |                      |
| GpmA    | Phosphoglycerate Mutase (2,3-bisphosphoglycerate dependent)   | <i>E. coli</i>               | ACT42583         | No               | +++              | +++               | -                    |
| GpmI    | Phosphoglycerate Mutase (2,3-bisphosphoglycerate independent) | <i>G. stearothermophilus</i> | KOR95229         | No               | +++              | +++               | +++                  |
| Eno     | Phosphoenolpyruvate hydratase                                 | <i>A. fulgidus</i>           | AIG98006         | No               | ++               | ++                |                      |
|         | Phosphoenolpyruvate hydratase                                 | <i>T. thermophilus</i>       | BAD69825         | No               | ++               | ++                | +++                  |
|         | Phosphoenolpyruvate hydratase                                 | <i>G. stearothermophilus</i> | KOR95275         | No               | +++              | +++               |                      |

|      |                             |                                             |          |     |     |                             |     |
|------|-----------------------------|---------------------------------------------|----------|-----|-----|-----------------------------|-----|
| Pyk  | Pyruvate Kinase             | <i>T. maritima</i>                          | AAD35300 | No  | ++  | ++                          |     |
|      | Pyruvate Kinase             | <i>T. thermophilus</i>                      | BAD69826 | No  | ++  | ++                          | +++ |
|      | Pyruvate Kinase A           | <i>G. stearothermophilus</i>                | KOR92563 | No  | +++ | +++                         |     |
| IlvC | Ketol-acid Reductoisomerase | <i>T. thermophilus</i>                      | BAD71034 | Yes | ++  | +                           | +++ |
|      | Ketol-acid Reductoisomerase | <i>G. stearothermophilus</i>                | KOR94737 | Yes | +++ | ++                          | +++ |
|      | Ketol-acid Reductoisomerase | <i>Thermococcus chitonophagus</i>           | ASJ16613 | Yes | +++ | ++                          | ++  |
|      | Ketol-acid Reductoisomerase | <i>Caldicellulosiruptor bescii</i> DSM 6725 | ACM59630 | Yes | +   | +                           | +++ |
| IlvD | Dihydroxyacid Dehydratase   | <i>S. mutans</i>                            | AJD56310 | No  | +++ | ++                          | ++  |
|      | Dihydroxyacid Dehydratase   | <i>G. stearothermophilus</i>                | KOR95295 | No  | +++ | O <sub>2</sub><br>sensitive |     |
|      | Dihydroxyacid Dehydratase   | <i>T. thermophilus</i>                      | BAD71057 | No  | ++  | O <sub>2</sub><br>sensitive |     |

**Supplementary Table 3. Data collection and refinement statistics.**

|                                                                                                                                                                                                                                                                                                                                                                            |                                               |
|----------------------------------------------------------------------------------------------------------------------------------------------------------------------------------------------------------------------------------------------------------------------------------------------------------------------------------------------------------------------------|-----------------------------------------------|
| <b>PDB identification number</b>                                                                                                                                                                                                                                                                                                                                           | <b>6VGS</b>                                   |
| <b>Ligand bound</b>                                                                                                                                                                                                                                                                                                                                                        | Thiamine pyrophosphate (TTP) with Mg ion      |
| <b>Data collection temperature (K)</b>                                                                                                                                                                                                                                                                                                                                     | 100                                           |
| <b>Data Collection Statistics</b>                                                                                                                                                                                                                                                                                                                                          |                                               |
| <b>Resolution (Å, high limit)</b>                                                                                                                                                                                                                                                                                                                                          | 1.80                                          |
| <b>Resolution (Å, low limit)</b>                                                                                                                                                                                                                                                                                                                                           | 100.00                                        |
| <b>Space group</b>                                                                                                                                                                                                                                                                                                                                                         | P2 <sub>1</sub> 2 <sub>1</sub> 2 <sub>1</sub> |
| <b>Unit cell parameters</b>                                                                                                                                                                                                                                                                                                                                                |                                               |
| <b>a (Å)</b>                                                                                                                                                                                                                                                                                                                                                               | 128.20                                        |
| <b>b (Å)</b>                                                                                                                                                                                                                                                                                                                                                               | 128.27                                        |
| <b>c (Å)</b>                                                                                                                                                                                                                                                                                                                                                               | 147.74                                        |
| <b>α, β, γ (°)</b>                                                                                                                                                                                                                                                                                                                                                         | 90.00, 90.00, 90.00                           |
| <b>Radiation source</b>                                                                                                                                                                                                                                                                                                                                                    | APS 24-ID-C                                   |
| <b>Radiation wavelength (Å)</b>                                                                                                                                                                                                                                                                                                                                            | 0.97930                                       |
| <b>Measured reflections</b>                                                                                                                                                                                                                                                                                                                                                | 1,972,360                                     |
| <b>Unique reflections</b>                                                                                                                                                                                                                                                                                                                                                  | 223,094                                       |
| <b>Overall completeness (%)</b>                                                                                                                                                                                                                                                                                                                                            | 99.40                                         |
| <b>Last shell completeness (%) (1.80-1.85 Å)</b>                                                                                                                                                                                                                                                                                                                           | 97.20                                         |
| <b>Overall redundancy</b>                                                                                                                                                                                                                                                                                                                                                  | 8.8                                           |
| <b>Last shell redundancy</b>                                                                                                                                                                                                                                                                                                                                               | 7.9                                           |
| <b>Overall <math>R_{merge}^a</math></b>                                                                                                                                                                                                                                                                                                                                    | 0.151                                         |
| <b>Last shell <math>R_{merge}^a</math> (1.80-1.85 Å)</b>                                                                                                                                                                                                                                                                                                                   | 1.055                                         |
| <b>Overall I/σ(I)</b>                                                                                                                                                                                                                                                                                                                                                      | 12.3                                          |
| <b>Last shell I/σ(I) (1.80-1.85 Å)</b>                                                                                                                                                                                                                                                                                                                                     | 2.1                                           |
| <b>Refinement Statistics</b>                                                                                                                                                                                                                                                                                                                                               |                                               |
| <b><math>R_{work}^b</math></b>                                                                                                                                                                                                                                                                                                                                             | 18.3                                          |
| <b><math>R_{free}^c</math></b>                                                                                                                                                                                                                                                                                                                                             | 21.0                                          |
| <b>Number of residues (protein/water)</b>                                                                                                                                                                                                                                                                                                                                  | 2164/1181                                     |
| <b>RMSD bond lengths (Å)</b>                                                                                                                                                                                                                                                                                                                                               | 0.008                                         |
| <b>RMSD bond angles (°)</b>                                                                                                                                                                                                                                                                                                                                                | 1.423                                         |
| <sup>a</sup> $R_{merge}(I) = \sum_{hkl} \sum_i  I_i(hkl) - \langle I(hkl) \rangle  / \sum_{hkl} \sum_i I_i(hkl)$<br><sup>b</sup> $R_{work} = \sum_{hkl}   F_{obs}  -  F_{calc}   / \sum_{hkl}  F_{obs} $<br><sup>c</sup> $R_{free} = \sum_{hkl}   F_{obs}  -  F_{calc}   / \sum_{hkl}  F_{obs} $ , where all reflections belong to a test set of 5% randomly selected data |                                               |

**Supplementary Table 4. Enzyme assay conditions.**

|                | <b>Coupling enzymes*</b> | <b>Cofactors and substrates</b>                                                                       |
|----------------|--------------------------|-------------------------------------------------------------------------------------------------------|
| <b>TmHex</b>   | PK/LDH                   | 1 mM ATP, 2.5 mM PEP, 1 mM NADH, 3 mM Glucose                                                         |
| <b>TmPgi</b>   | EcPfkB, PK/LDH           | 1 mM ATP, 2.5 mM PEP, 1 mM NADH, 3 mM Glucose-6-Phosphate                                             |
| <b>EcPfkB</b>  | PK/LDH                   | 1 mM ATP, 2.5 mM PEP, 1 mM NADH, 3 mM Fructose-6-Phosphate                                            |
| <b>TtFba</b>   | TmTpi, TkGapN            | 1 mM NADP <sup>+</sup> , 0.75 mM Glucose-1-Phosphate, 2.5 mM Fructose 1,6-bis-Phosphate               |
| <b>TmTpi</b>   | TkGapN                   | 1 mM NADP <sup>+</sup> , 0.75 mM Glucose-1-Phosphate, 2.5 mM Dihydroxyacetone Phosphate               |
| <b>TkGapN</b>  | TmTpi                    | 1 mM NADP <sup>+</sup> , 0.75 mM Glucose-1-Phosphate, 2.5 mM Dihydroxyacetone Phosphate               |
| <b>AfGapDH</b> | TmTpi, TmPgk             | 1 mM NADP <sup>+</sup> , 2.5 mM ADP, 4 mM PO <sub>4</sub> , 2.5 mM Dihydroxyacetone Phosphate         |
| <b>TmPgk</b>   | PK/LDH                   | 1 mM ATP, 1 mM NADH, 2.5 mM PEP, 2.5 mM Glycerate 3-Phosphate                                         |
| <b>Gs iPgm</b> | TtEno, PK/LDH            | 2.5 mM ADP, 2 mM NADH, 4 mM PO <sub>4</sub> , 0.5 mM MnCl <sub>2</sub> , 2.5 mM Glycerate 3-Phosphate |
| <b>TtEno</b>   | Gs iPgm, PK/LDH          | 2.5 mM ADP, 2 mM NADH, 4 mM PO <sub>4</sub> , 0.5 mM MnCl <sub>2</sub> , 2.5 mM Glycerate 3-Phosphate |
| <b>TtPyk</b>   | LDH                      | 1.5 mM ADP, 1 mM NADH, 3 mM PO <sub>4</sub> , 1 mM Fructose 1,6-bis-Phosphate, 3 mM PEP               |
| <b>AlsS</b>    | GsIlvC                   | 1 mM NADPH, 1 mM TPP, 5 mM Pyruvate                                                                   |
| <b>GsIlvC</b>  | AlsS                     | 1 mM NADPH, 1 mM TPP, 5 mM Pyruvate                                                                   |
| <b>SmIlvD</b>  | KivD, EcYahK             | 1 mM NADPH, 1 mM TPP, 2.5 mM (R)-2,3-dihydroxy-isovalerate                                            |
| <b>KivD</b>    | EcYahK                   | 1 mM NADPH, 1 mM TPP, 5 mM 2-ketoisovalerate                                                          |
| <b>EcYahK</b>  |                          | 1 mM NADPH, 5 mM Isobutyraldehyde                                                                     |

\*Enzyme concentrations given in Supplementary Table 5.

**Supplementary Table 5. Enzyme amounts per assay.**

| <b>Enzyme assayed</b> | <b>Amount added<br/>(<math>\mu\text{g}</math>)</b> | <b>Coupling enzymes<br/>amount added</b>                   |
|-----------------------|----------------------------------------------------|------------------------------------------------------------|
| <b>TmHex</b>          | 0.49                                               | PK/LDH* (2 $\mu\text{L}$ )                                 |
| <b>TmPgi</b>          | 0.55                                               | EcPfkB (76 $\mu\text{g}$ )/PK/LDH (2 $\mu\text{L}$ )       |
| <b>EcPfkB</b>         | 1.52                                               | PK/LDH (2 $\mu\text{L}$ )                                  |
| <b>TtFba</b>          | 10.47                                              | TmTpi (43.15 $\mu\text{g}$ )/TkGapN' (330 $\mu\text{g}$ )  |
| <b>TmTpi</b>          | 0.48                                               | TkGapN' (114 $\mu\text{g}$ )                               |
| <b>TkGapN'</b>        | 1.66                                               | TmTpi (43.15 $\mu\text{g}$ )                               |
| <b>AfGapDH</b>        | 122.2                                              | TmTpi (43.15 $\mu\text{g}$ )/TmPgk (390 $\mu\text{g}$ )    |
| <b>TmPgk</b>          | 1.56                                               | PK/LDH (30 $\mu\text{L}$ )                                 |
| <b>Gs iPgm</b>        | 3.53                                               | TtEno (216 $\mu\text{g}$ )/PK/LDH (10 $\mu\text{L}$ )      |
| <b>TtEno</b>          | 1.08                                               | Gs iPgm (348.25 $\mu\text{g}$ )/PK/LDH (10 $\mu\text{L}$ ) |
| <b>TtPyk</b>          | 1.67                                               | LDH** (2 $\mu\text{L}$ )                                   |
| <b>AlsS-P</b>         | 1.10                                               | GsIlvC (183 $\mu\text{g}$ )                                |
| <b>GsIlvC</b>         | 12.2                                               | AlsS-P (169 $\mu\text{g}$ )                                |
| <b>SmIlvD</b>         | 42.7                                               | KivD-S (155 $\mu\text{g}$ )/EcYahK (271 $\mu\text{g}$ )    |
| <b>KivD-S</b>         | 2.64                                               | EcYahK (271 $\mu\text{g}$ )                                |
| <b>EcYahK</b>         | 84                                                 | none                                                       |

\* PK/LDH solution was purchased from Sigma-Aldrich (catalog number: P0294)

\*\* LDH was purchased from Millipore Sigma and resuspended in 50% glycerol solution containing 10 mM HEPES, pH 7.0, 100 mM KCl and 0.1 mM EDTA at a concentration of 0.2 units/ $\mu\text{L}$  (catalog number: 427217)

**Supplementary Table 6. Enzyme specific activities and loadings for isobutanol production system.**

| <b>Enzyme</b> | <b>Stock (mg/mL)</b> | <b>Activity (units/mg)</b> | <b>Loading concentration (mg/mL)</b> | <b>Units added (per mL)</b> |
|---------------|----------------------|----------------------------|--------------------------------------|-----------------------------|
| TmHex         | 4.87                 | 14.5±0.3                   | 0.14                                 | 2.03                        |
| TmPgi         | 6.08                 | 29.6±1.1                   | 0.30                                 | 8.82                        |
| EcPfkB        | 13.47                | 8.3±0.1                    | 0.22                                 | 1.82                        |
| TtFba         | 2.59                 | 4.7±0.1                    | 0.35                                 | 1.64                        |
| TmTpi         | 2.85                 | 210±0.7                    | 0.14                                 | 30.44                       |
| TkGapN'       | 9.73                 | 7.6±0.8                    | 0.46                                 | 3.45                        |
| AfGapDH       | 8.87                 | 10.9±0.6                   | 0.05                                 | 0.53                        |
| TmPgk         | 2.23                 | 8.4±0.5                    | 0.20                                 | 1.68                        |
| Gs iPgm       | 13.93                | 49.4±2.2                   | 0.18                                 | 8.88                        |
| TtEno         | 6.75                 | 117±5                      | 0.66                                 | 77.18                       |
| TtPyk         | 4.82                 | 23.8±0.8                   | 0.20                                 | 4.76                        |
| BsAlsS-P      | 7.49                 | 4.9±0.2                    | 0.10                                 | 0.50                        |
| GsIlvC        | 9.86                 | 0.9±0.1                    | 1.13                                 | 1.01                        |
| SmIlvD        | 4.27                 | 2.7±0.2                    | 0.46                                 | 1.27                        |
| KivD-S        | 45.73                | 18.0±1.6                   | 0.15                                 | 2.70                        |
| EcYahK        | 17.29                | 4.5±0.4                    | 0.27                                 | 1.20                        |



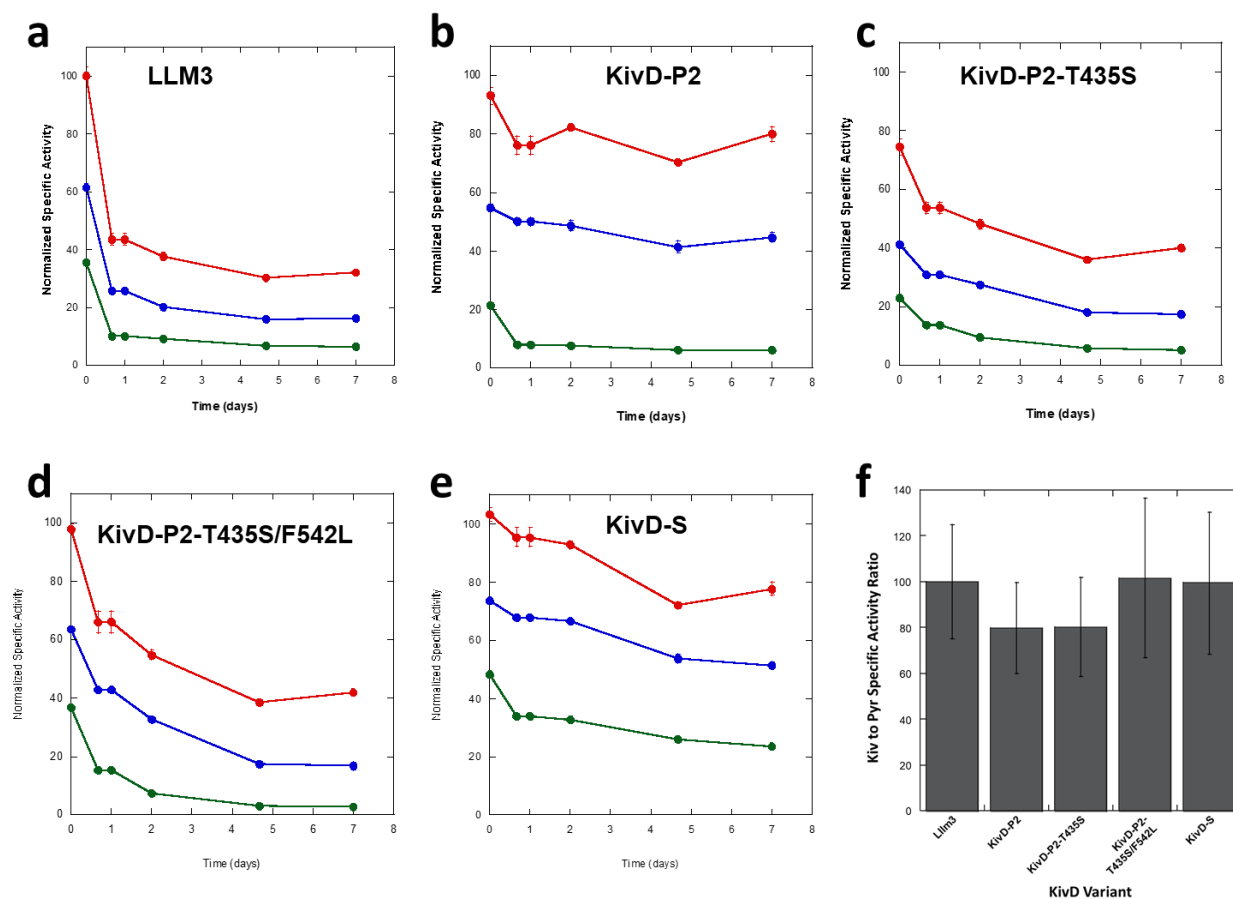

**Supplementary Fig. 1. Stabilizing KivD.** **a-e**, The activity of the indicated enzymes over time during incubation in 0% (red), 4% (blue) or 8% (green) isobutanol. In these screening assays, the enzyme solution was only diluted 2-fold in the final assay mix. Hence, the final assays contained 0%, 2% or 4% isobutanol, which accounts for the different initial activities. **f**, Ratio of specific activity for the substrates  $\alpha$ -ketoisovalerate and pyruvate with the indicated enzymes. Error bars represent standard deviations of biological triplicates. Source data are provided as a Source Data file.

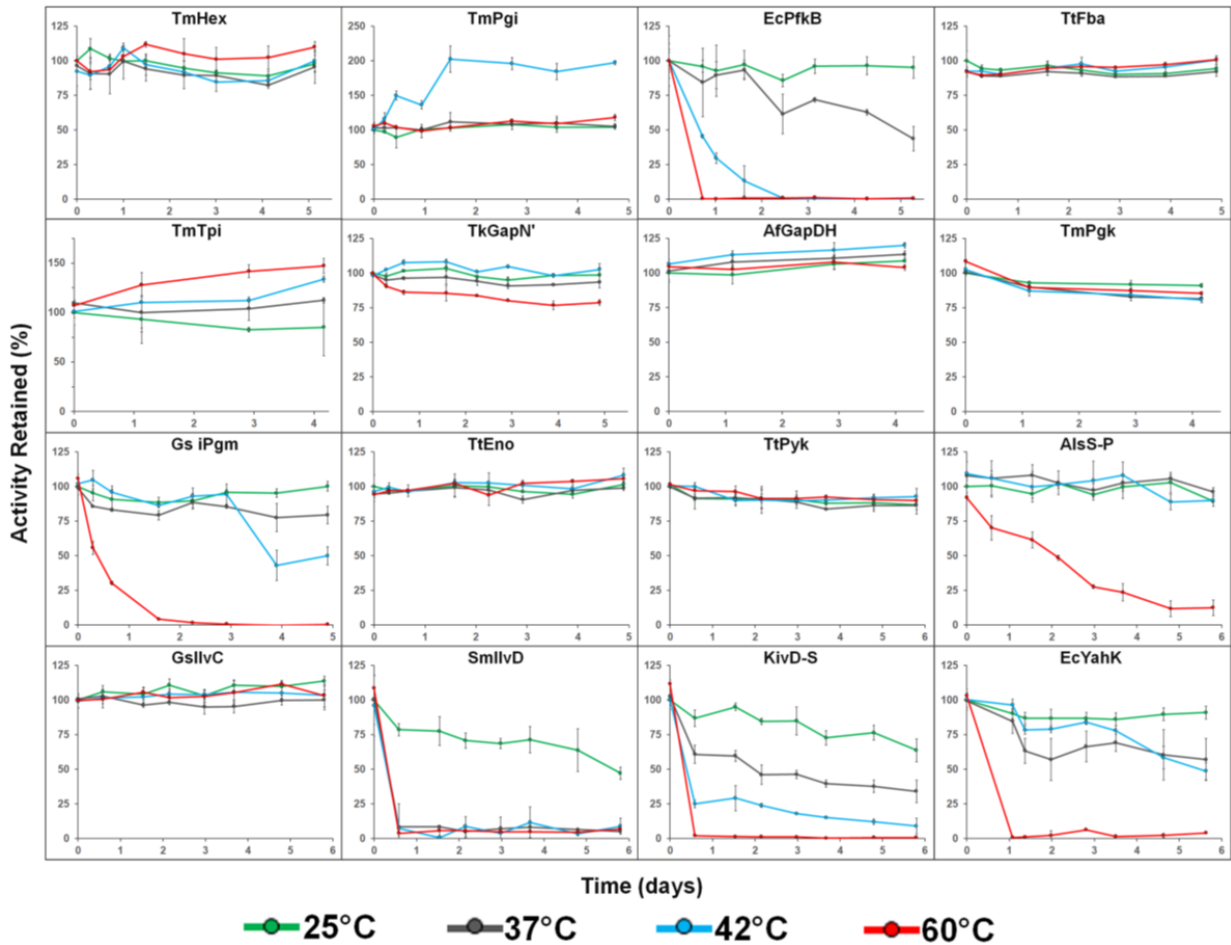

**Supplementary Fig. 2. Thermal tolerance of enzymes used in this work.** Enzymes were incubated at the indicated temperatures and aliquots assayed over time. Activity retained is the percentage of activity remaining compared to the activity at time zero and 25°C. Error bars represent the standard deviation of biological triplicates. Source data are provided as a Source Data file.

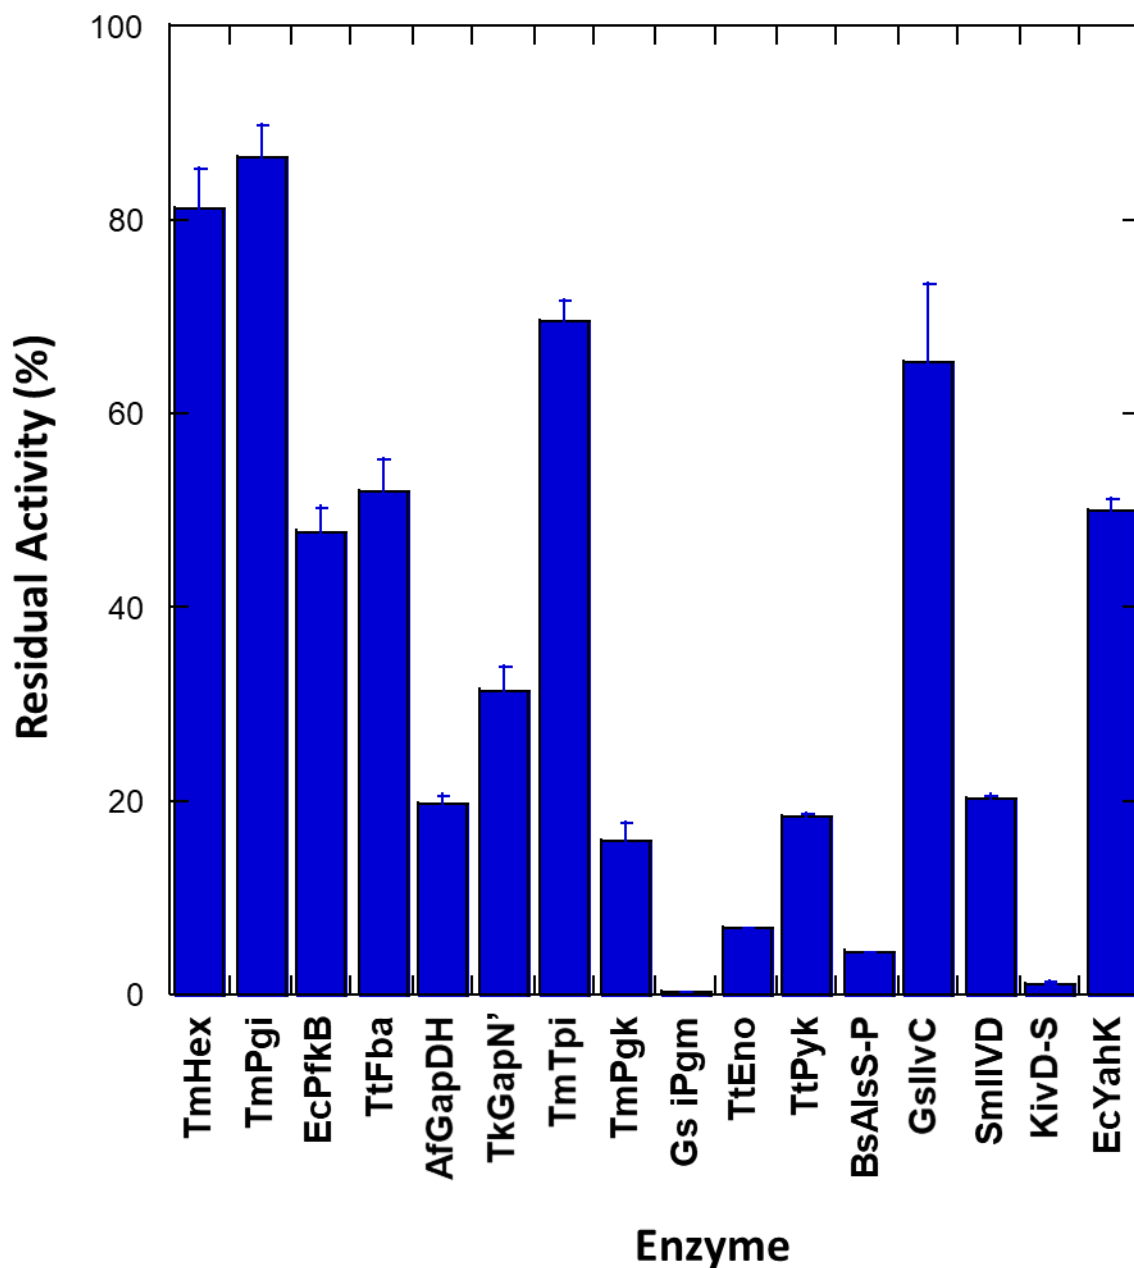

**Supplementary Fig. 3. Residual activity of enzymes after 120 hours in bioreactor reaction that included addition of second aliquot of BsAlsS-P and KivD-S.** The progress of the reaction is shown in Fig. 5. Error bars represent the mean and standard deviation of triplicates. Source data are provided as a Source Data file.

## Supplementary References

1. Kurylenko, O. O., Ruchala, J., Dmytruk, K. V., Abbas, C. A. & Sibirny, A. A. Multinuclear yeast *Magnusiomyces* (*Dipodascus*, *Endomyces*) *magnusii* is a promising isobutanol producer. *Biotechnology Journal*, <https://doi.org/10.1002/biot.201900490>
2. Park, S.-H. & Hahn, J.-S. Development of an efficient cytosolic isobutanol production pathway in *Saccharomyces cerevisiae* by optimizing copy numbers and expression of the pathway genes based on the toxic effect of  $\alpha$ -acetolactate. *Scientific Reports* **9**, 3996 (2019).
3. Zhang, Y. *et al.* Xylose utilization stimulates mitochondrial production of isobutanol and 2-methyl-1-butanol in *Saccharomyces cerevisiae*. *Biotechnology for Biofuels* **12**, 223 (2019).
4. Zhao, E. M. *et al.* Optogenetic regulation of engineered cellular metabolism for microbial chemical production. *Nature* **555**, 683–687 (2018).
5. Lee, W.-H. *et al.* Isobutanol production in engineered *Saccharomyces cerevisiae* by overexpression of 2-ketoisovalerate decarboxylase and valine biosynthetic enzymes. *Bioprocess Biosyst Eng* **35**, 1467–1475 (2012).
6. Avalos, J. L., Fink, G. R. & Stephanopoulos, G. Compartmentalization of metabolic pathways in yeast mitochondria improves the production of branched-chain alcohols. *Nature Biotechnology* **31**, 335–341 (2013).
7. Matsuda, F. *et al.* Increased isobutanol production in *Saccharomyces cerevisiae* by eliminating competing pathways and resolving cofactor imbalance. *Microbial Cell Factories* **12**, 119 (2013).
8. Zhang, Y., Hammer, S. K., Carrasco-Lopez, C., Garcia Echauri, S. A. & Avalos, J. L. Genetically encoded biosensors for branched-chain amino acid metabolism to monitor mitochondrial and cytosolic production of isobutanol and isopentanol in yeast. bioRxiv 2020.03.08.982801 (2020) doi:10.1101/2020.03.08.982801.
9. Promdonkoy, P., Mhuantong, W., Champreda, V., Tanapongpipat, S. & Runguphan, W. Improvement in d-xylose utilization and isobutanol production in *S. cerevisiae* by adaptive laboratory evolution and rational engineering. *J Ind Microbiol Biotechnol* (2020) doi:10.1007/s10295-020-02281-9.
10. Holwerda, E. K. *et al.* Metabolic and evolutionary responses of *Clostridium thermocellum* to genetic interventions aimed at improving ethanol production. *Biotechnology for Biofuels* **13**, 40 (2020).
11. Lin, P. P. *et al.* Consolidated bioprocessing of cellulose to isobutanol using *Clostridium thermocellum*. *Metabolic Engineering* **31**, 44–52 (2015).

12. Higashide, W., Li, Y., Yang, Y. & Liao, J. C. Metabolic engineering of *Clostridium cellulolyticum* for production of isobutanol from cellulose. *Appl. Environ. Microbiol.* **77**, 2727–2733 (2011).
13. Lin, P. P. *et al.* Isobutanol production at elevated temperatures in thermophilic *Geobacillus thermoglucosidasius*. *Metabolic Engineering* **24**, 1–8 (2014).
14. Qi, H. *et al.* Model-driven redox pathway manipulation for improved isobutanol production in *Bacillus subtilis* complemented with experimental validation and metabolic profiling analysis. *PLoS ONE* **9**, e93815 (2014).
15. Choi, K.-Y., Wernick, D. G., Tat, C. A. & Liao, J. C. Consolidated conversion of protein waste into biofuels and ammonia using *Bacillus subtilis*. *Metabolic Engineering* **23**, 53–61 (2014).
16. Boock, J. T. *et al.* Engineered microbial biofuel production and recovery under supercritical carbon dioxide. *Nature Communications* **10**, 587 (2019).
17. Atsumi, S., Higashide, W. & Liao, J. C. Direct photosynthetic recycling of carbon dioxide to isobutyraldehyde. *Nature Biotechnology* **27**, 1177–1180 (2009).
18. Li, H. *et al.* Integrated electromicrobial conversion of CO<sub>2</sub> to higher alcohols. *Science* **335**, 1596–1596 (2012).
19. Baez, A., Cho, K.-M. & Liao, J. C. High-flux isobutanol production using engineered *Escherichia coli*: a bioreactor study with in situ product removal. *Appl. Microbiol. Biotechnol.* **90**, 1681–1690 (2011).
20. Atsumi, S., Hanai, T. & Liao, J. C. Non-fermentative pathways for synthesis of branched-chain higher alcohols as biofuels. *Nature* **451**, 86–89 (2008).
21. Huo, Y.-X. *et al.* Conversion of proteins into biofuels by engineering nitrogen flux. *Nature Biotechnology* **29**, 346–351 (2011).
