# Supplementary material for: Isobutanol production freed from biological limits using synthetic biochemistry
Source: PubMed Central journal article supplement (PMC7453195; doi:10.1038/s41467-020-18124-1), 2020-08-27
Supplement: 41467_2020_18124_MOESM3_ESM.pdf [file 41467_2020_18124_MOESM3_ESM.pdf]

## **Description of Additional Supplementary Files**

Supplementary Data 1

Protein sequences of enzymes used in this study

Supplementary Data 2

DNA sequences of enzymes used in this study
